# 1 THE BIOSYNTHETIC COSTS OF AMINO ACIDS 2 AT THE BASE OF THE FOOD CHAIN 3 DETERMINE THEIR USE IN HIGHER-ORDER 4 CONSUMER GENOMES

5  
6 Javier Gómez Ortega<sup>1</sup>, Sonika Tyagi<sup>1</sup>, Christen K. Mirth<sup>1\*</sup> and Matthew D. W.  
7 Piper. <sup>1\*</sup>

8 <sup>1</sup> School of Biological Sciences, Monash University, 14 Rainforest Walk,  
9 Clayton, Victoria, 3800, Australia

10 \* Christen K. Mirth and Matthew D. W. Piper contributed equally to this work

## 11 ABSTRACT

12  
13 Dietary nutrient composition is essential for shaping important fitness traits and  
14 behaviours. Many organisms are protein limited and for *Drosophila*  
15 *melanogaster*, this limitation manifests at the level of the single most limiting  
16 essential Amino Acid (AA) in the diet. The identity of this AA and its effects on  
17 female fecundity is readily predictable by a procedure called exome matching in  
18 which the sum of AAs encoded by a consumer's exome is used to predict the  
19 relative proportion of AAs required in its diet. However, the exome matching  
20 calculation does not weight AA contributions to the overall profile by protein size  
21 or expression. Here we update the exome matching calculation to include these  
22 weightings. Surprisingly, although nearly half of the transcriptome is differentially  
23 expressed when comparing male and female flies, we found that creating  
24 transcriptome-weighted exome matched diets for each sex did not enhance their  
25 fecundity over that supported by exome matching alone. These data indicate that  
26 while organisms may require different amounts of dietary protein across  
27 conditions, the relative proportion of the constituent AAs remains constant.  
28 Interestingly, we also found remarkable conservation of exome matched AA  
29 profiles across taxa and that the composition of these profiles could be explained  
30 by the metabolic costs of microbial AA synthesis. Thus, it appears that  
31 bioenergetic constraints amongst autotrophs shape the relative proportion of AAs  
32 that are available across trophic levels and that that this constrains biomass  
33 composition.

## 34 INTRODUCTION

35

36 Nutrition is one of the most important environmental determinants of evolutionary  
37 fitness; it supplies organisms with energy and the building blocks they require for  
38 growth, reproduction, and somatic maintenance (Simpson and Raubenheimer,  
39 2012). However, the natural availability of food and its nutritional qualities vary  
40 and inevitably differ from the consumer's needs (Denno and Fagan, 2003;  
41 Simpson and Raubenheimer, 2012; Wilder *et al.*, 2013). As such, evolutionary  
42 fitness is constrained by the divergence between nutrient demand and their  
43 availability. Because of this, optimising nutrition to enhance growth, reproduction,  
44 and health is of major interest from both a fundamental biology and a commercial  
45 perspective.

46

47 Among the main components in the diet, protein is the limiting nutrient for the  
48 growth and reproduction of many organisms. It is, therefore, a principal constraint  
49 on evolutionary fitness (Simpson and Raubenheimer, 2012; Solon-Biet *et al.*,  
50 2015; Simpson *et al.*, 2017; Jang and Lee, 2018). For example, the abundance  
51 of protein-rich food has been shown to increase population size or stimulate body  
52 growth of birds such as the galah (*Eolophus roseicapilus*) or the goldfinch  
53 (*Carduelis carduelis*) and mammals like the house mouse (*Mus musculus*) or  
54 several species of squirrels (*Sciurus and Tamiasciurus spp.*) (Smith, 1968, 1991;  
55 Nixon, 1970; Nixon, McClain and Donohoe, 1975; Glück, 1988; Keith and Bell,  
56 1989; White, 1993). In the fruit fly *Drosophila melanogaster*, we have found that  
57 female reproduction is reduced by decreasing overall dietary protein  
58 concentration (Bass *et al.*, 2007; Piper *et al.*, 2014, 2017). We also found that this  
59 protein limitation is determined by the concentration of the single most limiting  
60 essential Amino Acid (AA) in the diet, which can be identified by comparing the  
61 proportion of AAs that is available in food against the proportion of AAs encoded  
62 by the fly's exome – a procedure we called exome matching (Bass *et al.*, 2007;  
63 Piper *et al.*, 2014, 2017). Evidence from our work, and that of others, indicates  
64 that exome matching may have broader application as protein limitation also  
65 occurs at the level of single AAs in other species (Lochmiller *et al.*, 1995; Ramsay  
66 and Houston, 1998; Webb *et al.*, 2005; Piper *et al.*, 2017).

67

68 To predict limiting AAs, our exome matching protocol involves two steps. First,  
69 we calculate each AA's relative abundance in every protein of an organism's *in*  
70 *silico* translated exome. Second, we find the average proportional representation  
71 for each AA across all proteins encoded by the exome. This genome-wide  
72 averaged AA proportion can then be compared to the AA proportion in the food  
73 to identify the essential AA that is most underrepresented in the diet and thus  
74 predicted to be limiting. We demonstrated that supplementing the diets of flies  
75 and mice with the limiting AA that was identified in this way can improve growth  
76 and reproduction and modify feeding behaviour (Piper *et al.*, 2017; Solon-Biet *et*  
77 *al.*, 2019; Sjøberg *et al.*, 2020). Thus, for every organism whose genome has  
78 been sequenced, exome matching can theoretically be used as a tool to guide  
79 precision nutrition for better health.

80

81 Although we showed exome matching to be biologically effective, its current  
82 implementation does not incorporate weightings for the substantial differences  
83 we know to exist in genes' sizes and their degree of expression (Oshlack and  
84 Wakefield, 2009). Many studies have documented considerable differences in  
85 gene expression profiles when comparing transcriptomes between sexes, across  
86 life-history stages, or in response to biotic and abiotic stimuli (Hegedus *et al.*,  
87 2009; May and Zwaan, 2017; Camus, Piper and Reuter, 2019; Li *et al.*, 2019;  
88 Moskalev *et al.*, 2019). For instance, in *Drosophila*, more than 8,000 genes,  
89 representing at least 50% of the genome, have been reported to be differentially  
90 expressed when comparing adult males with fertilised females – an observation  
91 that is unsurprising given the much heavier anabolic burden of reproduction for  
92 females than for males (Camus, Piper and Reuter, 2019). Thus, we predicted that  
93 we could improve the precision of exome matching by incorporating weightings  
94 for gene expression changes and in doing so, would establish a new way of  
95 tailoring diets to match an organism's individual AA demands for life-stage and  
96 health status. Here, we set out to test this prediction and, in doing so, uncover  
97 that there is a surprisingly small variation in the way genomes from evolutionarily  
98 distant organisms encode AA usage. These data indicate a fundamental energy  
99 constraint on body composition across taxa.

## 100 RESULTS

101

### 102 CALCULATING TRANSCRIPTOME-WEIGHTED, EXOME- 103 MATCHED DIETARY AA PROPORTIONS

104 Our previous research demonstrated that female flies fed food containing exome-  
105 matched AA proportions (FLYAA) laid more eggs than flies on food with  
106 equivalent amounts of protein comprised of mismatched AA proportions (Piper *et*  
107 *al.*, 2017). Although FLYAA demonstrably improved egg-laying, we hypothesised  
108 it could be further improved by weighting each gene's contribution to the overall  
109 average by its length and expression level. We reasoned that although there is  
110 not a 1:1 association between transcription and translation, the transcriptome  
111 would be a good approximation for the expression weightings for two reasons.  
112 First, transcriptomics readily yields a more complete set of gene expression  
113 values than proteomics (Pible and Armengaud, 2015; Manzoni *et al.*, 2018). And,  
114 second, if the availability of dietary AAs constrains organismal protein expression,  
115 whole genome proteomics would simply reflect the constraints of diet quality. In  
116 contrast gene expression values may indicate protein expression levels that  
117 could be achieved if dietary AA availability was not a constraint - i.e. better  
118 matched to requirements.

119

120 We downloaded transcriptome profiles of whole male and whole female flies from  
121 FlyAtlas 2 and modENCODE, and from these profiles we averaged the levels of  
122 gene expression for each sex (Robinson *et al.*, 2013; Brown and Celniker, 2015).  
123 To make our new sex-specific, transcriptome-matched profiles, we first counted  
124 the number of each AA that is encoded by each protein isoform in the fly genome.  
125 We then weighted these AA counts by the average isoform relative transcript  
126 abundance (FPKM value; see Materials and Methods) found for male or female  
127 flies. For each AA, we then summed the weighted AA counts across all genes  
128 and used these values to compute each AA's proportional representation across  
129 all expressed genes. These newly designed AA ratios for the sexes were labelled  
130 MALEAA and FEMALEAA, and these became the basis for new dietary AA  
131 profiles (Figure 1).

132

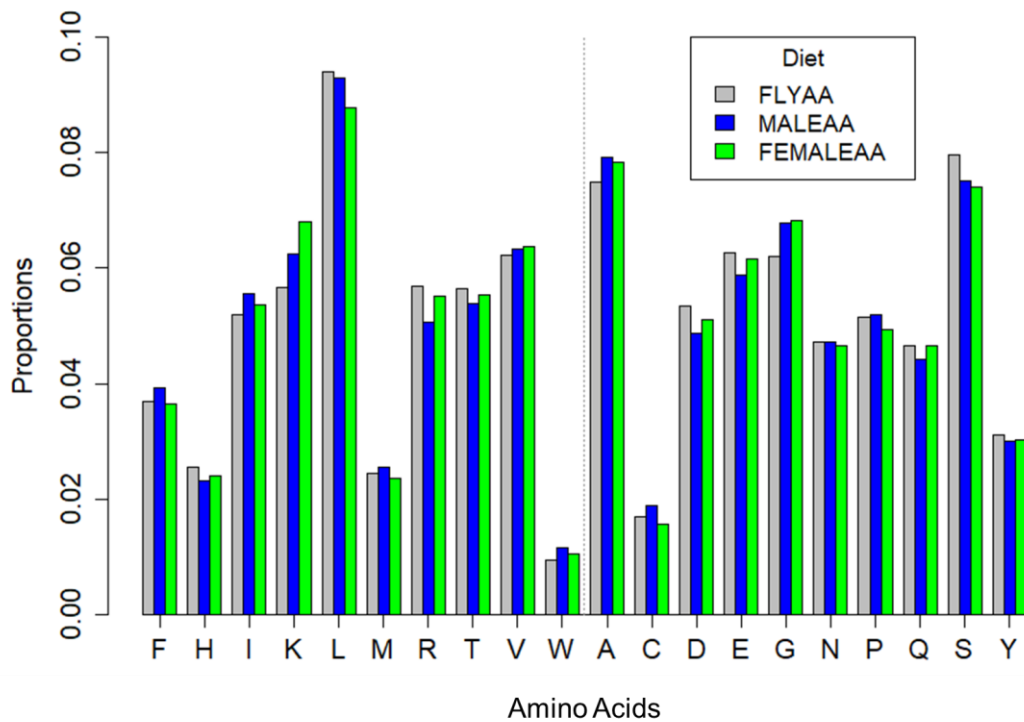

133

134 *FIGURE 1. COMPARISON OF THE EXOME MATCHED AND TRANSCRIPTOME WEIGHTED AA*  
135 *RATIOS.*

136 Proportion of each AA in the exome matched (Piper *et al.*, 2017) and transcriptome-  
137 weighted exome matched diets (MALEAA and FEMALEAA). In these diets, the  
138 average proportions of AAs have been generated after weighting each protein's  
139 contribution by size and its average gene expression in male and female  
140 transcriptomes, respectively. The dotted grey line separates the essential (left) from  
141 the non-essential (right) AAs. IUPAC single-letter AA codes are shown.

142

143

144 TRANSCRIPTOME-WEIGHTED EXOME MATCHING THE  
145 DIETARY AA PROFILE DOES NOT IMPROVE MALE FERTILITY  
146 OVER THAT ON AN EXOME MATCHED DIET

147

148 To test the effects of dietary AAs on male fertility, we used an assay in which  
149 males were challenged to inseminate females at maximum capacity, as this  
150 should deplete the males of sperm and/or seminal fluid and thus require them to  
151 be synthesising more from the dietary AAs they have available. To do this, we  
152 supplied singly housed males with ten new virgin females per day for seven days  
153 and counted how many of these females subsequently produced viable offspring.  
154 We found that while on the first day, males could inseminate 8 to 10 of these  
155 virgins, during the course of the assay, the number of females that each male  
156 could inseminate dropped to at least half of the number found for day one (Figure  
157 2A) indicating that the males were indeed operating at maximum capacity in this  
158 assay.

159

160 To test if male fecundity changed in response to altered dietary protein levels, we  
161 performed the above assay on males that were maintained on food in which the  
162 AA proportion was fixed (FLYAA), but the total concentration was diluted from  
163 10.7g/l (positive control; the level in our standard “rich” diet) to 2.1 g/l, 1.1 g/l and  
164 0 g/l. Male fertility was significantly lower than the positive control when the flies  
165 were maintained on 0 g/l and 1.1 g/l AAs ( $P < 0.001$ ) (Figure 2A). Surprisingly,  
166 when the protein concentration was 2.1 g/l, male fertility increased to the level of  
167 flies maintained on the positive control condition (Figure 2A, 2B). Thus, maximum  
168 male fertility in our assay responded to dietary AA levels and only relatively small  
169 amounts were required to support maximal fertility. The response of male  
170 fecundity to dietary AA concentration could be modelled by a sigmoidal dose-  
171 response curve with an inflexion point somewhere between 1.1 – 2.1 g/l AA  
172 (Figure 2B).

173

174 If MALEAA represents the ideal proportion of AAs for male fecundity, we predict  
175 that males fed FLYAA would be tryptophan (trp, W) limited, and that for a fixed  
176 sum of AAs changing the proportion to MALEAA would yield a 20% increase in

177 AA availability for reproduction (Figure 2C). However, when we compared the  
178 fecundity response of male flies kept on MALEAA and FLYAA at each of the  
179 dietary AA concentrations, we saw that AA ratio did not alter the number of  
180 females that were successfully inseminated, even under conditions where male  
181 fertility was clearly AA limited (1.1 g/L; Figure 2D).

182

183 A possible reason why MALEAA did not improve fecundity is that males might  
184 contain sufficient stores of tryptophan in body proteins that they can retrieve and  
185 use to overcome the limitation we predicted. If this were the case, our prediction  
186 of a 20% improvement in fecundity would be an overestimate. To assess this, we  
187 made another diet in which only tryptophan was omitted from the diet altogether.  
188 We evaluated the effect of this diet and found that it caused a significant reduction  
189 in fecundity compared to the positive control diet (10.7g/l). It was also equally as  
190 detrimental for fecundity as a diet without AAs, both in terms of the rate at which  
191 fertility fell, and the total number of females successfully fertilised during the  
192 assay (Figure 2E). Thus, dietary tryptophan is required to sustain male fecundity  
193 in this assay, and its requirement does not appear to be lessened due to the  
194 recovery of tryptophan stored in body tissue.

195

196 Another reason why MALEAA may not have improved fecundity over FLYAA is  
197 that the actual set of proteins required for male fecundity are only a subset of  
198 those included in our calculation and that MALEAA is actually a worse AA balance  
199 for the organs responsible for making the proteins required for fecundity. To  
200 investigate this possibility, we calculated transcriptome-weighted AA profiles for  
201 each tissue type in male flies using RNAseq data from FlyAtlas (Robinson *et al.*,  
202 2013). We then compared these tissue profiles to both the unweighted (FLYAA)  
203 and transcriptome weighted (MALEAA) dietary AA profiles and predicted each  
204 tissue's limiting AA and the degree to which it is limiting. The data are expressed  
205 as a relative match where 0 indicates the complete absence of an essential AA  
206 and 100 represents that all dietary AAs are perfectly matched to the tissue-  
207 specific profile (Figure 2F). The data show that MALEAA is predicted to be a  
208 better match than FLYAA for the expression of the genes in each tissue, except  
209 for those in the salivary glands in which FLYAA is predicted to be a better match  
210 than MALEAA. Thus, we still predict that MALEAA would be an improved AA

211 profile over FLYAA for male reproduction if transcriptome weighting the exome  
212 provided a superior prediction of dietary requirements. However, our tissue-  
213 specific analysis does reveal that MALEAA is predicted to confer a smaller  
214 improvement over FLYAA if only the profile of the testis (62% – 68%; 9.6%  
215 increase) or accessory glands (80% – 88%; 10% increase) matter for our assay  
216 of male fecundity. It is possible that this small degree of enhancement in male  
217 fecundity was beyond the sensitivity of our assay to be detected.  
218  
219





229 0.537; least-squares fit). (\*\*\*) =  $P < 0.001$ , in comparison with 0 g/L). Error bars  
230 represent the standard deviation.

231 (C) Predicted difference in each essential AA when comparing the male transcriptome  
232 matched proportions (MALEAA), and the exome matched proportions (FLYAA). A  
233 positive difference indicates that the AA is more abundant in MALEAA than in the  
234 FLYAA. MALEAA should cover any essential AA deficiency of FLYAA, and thus, the  
235 relative increase in the concentration of the most limiting essential AA (Tryptophan,  
236 W, 20%) equals the potential increase in fecundity that could be achieved for flies fed  
237 with MALEAA.

238 (D) Males fed with a diet containing a transcriptome (MALEAA) matched AA proportion  
239 did not differ from those fed the exome matched (FLYAA) diets for any concentration  
240 of AAs tested. Error bars represent the standard deviation.

241 (E) The effect of tryptophan dropout from the diet on the daily capacity of males to fertilise  
242 females during a seven-day period. The removal of tryptophan from the diet caused  
243 a fast decay in fertilisation that matched that caused by the removal of all AAs. AAs  
244 were provided in the male transcriptome matched proportion, MALEAA. Error bars  
245 represent the standard deviation.

246 (F) Coverage of the predicted dietary AA requirements by MALEAA and FLYAA when  
247 compared to the transcriptome weighted exome match proportion from each tissue  
248 in male flies. For each tissue, the x-axis displays the degree to which the limiting AA  
249 demand is met by the diets MALEAA (blue) and FLYAA (black). The closer to 100%,  
250 the better the diet covers the predicted tissue demand for AAs. For all tissues, except  
251 the salivary gland, MALEAA is predicted to be a better match for requirements than  
252 FLYAA. The predicted limiting AA for each tissue on each diet is indicated by the  
253 three letter AA codes.

254

255

256

## 257 TRANSCRIPTOME-WEIGHTED EXOME MATCHING THE 258 DIETARY AA PROFILE DOES NOT IMPROVE FEMALE 259 FECUNDITY OVER THAT ON AN EXOME MATCHED DIET

260

261 Our previous data indicate that female egg-laying is a reliable indicator of dietary  
262 AA composition, and typically has lower variability and greater sensitivity than the  
263 male fecundity assay we performed (Piper *et al.*, 2017). We thus tested if  
264 FEMALEAA had a higher nutritional value than FLYAA to sustain female

265 fecundity. Two-day-old mated females were placed on chemically defined diets,  
266 and the number of eggs they laid over the course of eight days was counted. In  
267 line with previous results (Piper *et al.*, 2017), female egg production responded  
268 in a linear manner to increasing AA concentrations until at least 10.7 g/L (Figure  
269 3A). This is consistent with dietary AAs quantitatively limiting female egg-laying,  
270 which we have previously shown to be due to the most limiting essential AA (Piper  
271 *et al.*, 2017).

272

273 We predicted that if the transcriptome-weighted diet (FEMALEAA) represented  
274 the actual AA requirements for females for egg-laying, lysine (K, Lys) would limit  
275 egg production for females feeding on the non-weighted AA ratio (FLYAA) (Figure  
276 3B). By comparing the AA profile of FEMALEAA to that of FLYAA, we also  
277 predicted that egg production could be up to 20% higher when incorporating  
278 transcriptome weightings into the exome match profile (Figure 3B). However,  
279 FEMALEAA did not improve female fecundity output in comparison to FLYAA at  
280 either concentration of dietary AAs tested (Figure 3C). This included a  
281 concentration at which AAs clearly limited egg production (5.4 g/L) and so should  
282 be the most sensitive test of the change in availability of the most limiting AA.

283

284 We tested if the reason why female flies produced no more eggs on FEMALEAA  
285 than when on FLYAA is that they could supplement limiting dietary lysine by  
286 retrieving it from body protein reservoirs. If dietary lysine limits egg-laying, and  
287 the flies do not supplement it from body reserves, the flies should exhibit reduced  
288 egg production in proportion to the dilution of lysine in the diet. This is exactly  
289 what we observed when we reduced lysine only in an otherwise constant  
290 nutritional background containing 10.7 g/L FLYAA (Figure 3D). This  
291 demonstrates that lysine is both essential and limiting in FLYAA for female  
292 fecundity and indicates that lysine limitation is not lessened by flies retrieving it  
293 from stored body protein.

294

295 We also tested if FEMALEAA is not superior to FLYAA to support egg production  
296 because the flies use only a subset of the transcriptome to produce eggs. To do  
297 this, we assessed the match between each tissue-specific AA profile and  
298 FEMALEAA or FLYAA. Similar to the comparison we made for males,

299 FEMALEAA was a better match than FLYAA to the transcriptome weighted AA  
300 proportions of every female tissue except for the salivary glands (Figure 3E).  
301 Furthermore, if we consider only the tissues most relevant to reproduction, the  
302 ovaries and fat body, FEMALEAA represents a better match, and to a similar  
303 extent as whole-body samples, to their transcriptome-weighted exome profiles  
304 than FLYAA (16% and 15% for ovaries and fat body respectively). These data  
305 support our prediction that FEMALEAA should improve dietary AA availability for  
306 egg production over that found in FLYAA.

307

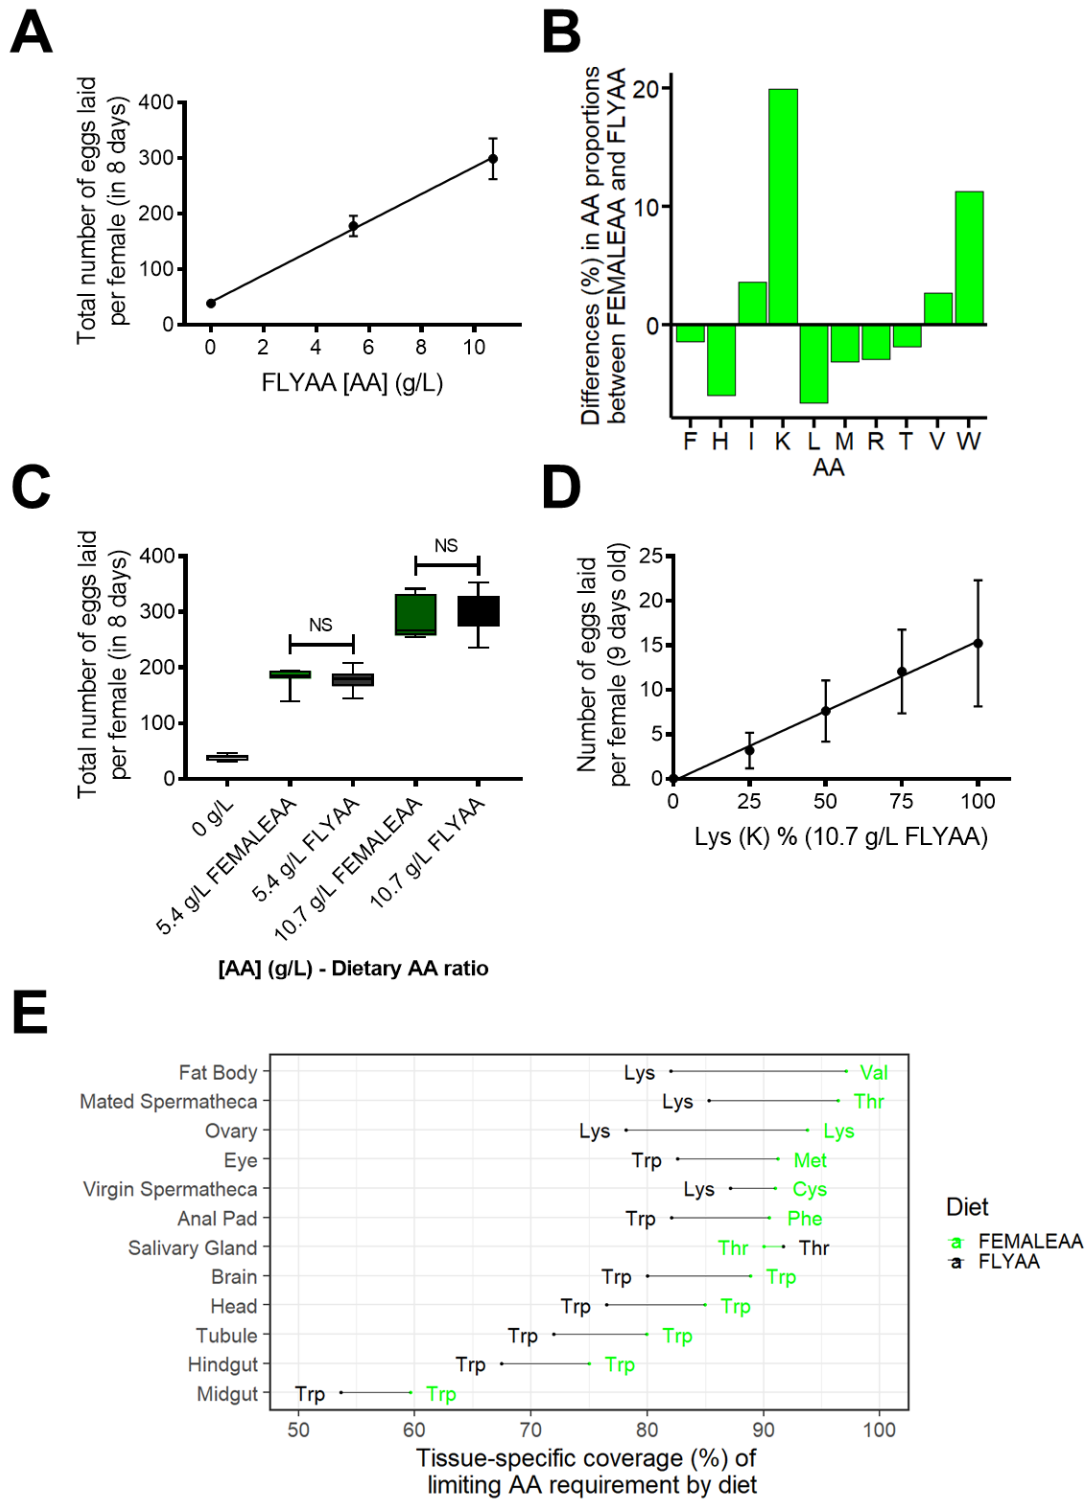

308

309 *FIGURE 3. FEMALE FECUNDITY RESPONSES TO CHANGES IN DIETARY AA RATIO AND*  
 310 *CONCENTRATION.*

311 (A) Total female fecundity showed a linear response to increasing dietary AA  
 312 concentrations (FLYAA).  $R^2 = 0.999$

313 (B) Relative change in the molar concentration of each essential AA between the female  
 314 transcriptome matched diet (FEMALEAA) and the exome matched diet (FLYAA). A

315 positive difference indicates that the AA is more abundant in FEMALEAA than in  
316 FLYAA. The relative increase in the concentration of the most limiting essential AA  
317 (Lysine, K, 20%) equals the potential increase in fecundity that could be achieved for  
318 flies fed with FEMALEAA.

319 (C) At each concentration of total AA, there was no difference in egg-laying output of  
320 females fed with transcriptome (FEMALEAA) or exome (FLYAA) matched diets.

321 (D) Lysine dilution limits egg production in a linear manner. Percentages of Lysine  
322 concentration are relative to the standard Lysine concentration on FLYAA with a total  
323 AA concentration of 10.7 g/L.  $R^2 = 0.995$ .

324 (E) Coverage of the predicted dietary AA requirements of each tissue in female flies by  
325 FEMALEAA and FLYAA. Tissue dietary AA requirements are predicted from the  
326 tissue-specific transcriptomes. For each tissue, the x-axis displays the percent of the  
327 limiting AA demand covered by the diets FEMALEAA (green) and FLYAA (black).  
328 The closer to 100%, the better the diet meets the theoretical tissue AA demand. For  
329 all tissues, except the salivary gland, FEMALEAA is predicted to be a better match  
330 for requirements than FLYAA. The predicted limiting AA for each tissue on each diet  
331 is indicated by the three-letter AA codes.

332

333 COMPARING GENOME-WIDE AA USAGE ACROSS TAXA  
334 INDICATES CONSTRAINTS FROM THE METABOLIC COSTS OF  
335 THEIR BIOSYNTHESIS

336

337 We have found that weighting the dietary exome matched AA ratio (FLYAA) by  
338 the average gene expression of male (MALEAA) or female (FEMALEAA) flies did  
339 not modify fly fecundity. This was surprising because the weightings incorporated  
340 changes in ~50% of the expressed transcriptome. These data indicate that  
341 despite these large changes in gene expression, there are constraints on the  
342 degree to which genome-wide expression changes can modify the dietary AA  
343 requirements of our flies. One of the ways this could happen is if the male and  
344 female transcriptome-weighted AA profiles converge on a similar AA usage as  
345 the non-weighted (FLYAA) profile. To assess the degree of similarity of our three  
346 AA profiles (FEMALEAA, MALEAA and FLYAA), we compared them in the  
347 context of a null distribution of expression profiles. To generate this null  
348 distribution, we permuted the gene labels on the male and female transcriptome-  
349 wide expression data 20,000 times, thus generating a set of divergent but  
350 biologically realistic transcriptome-wide expression profiles. For each of these  
351 profiles, we then calculated the transcriptome-wide AA usage, and then  
352 calculated the Euclidian distance between each of the permuted AA profiles and  
353 the median permuted profile. This revealed that the AA proportions of FLYAA,  
354 FEMALEAA and MALEAA were more distant from the median transcriptome-  
355 weighted AA profile than most of the permutations (>99% for FEMALEAA, >92%,  
356 for MALEAA, and >97% for FLYAA in the context of FEMALEAA and >74% for  
357 FLYAA in the context of MALEAA), indicating that, compared with the null  
358 distribution, they all represented extreme examples of AA usage (Figure 4 A &  
359 B). Because Euclidian distance only measures the degree of divergence between  
360 profiles and not the direction of change (i.e. whether an AA is more or less  
361 abundant), we plotted the proportional representation of each AA for each AA  
362 profile (Figure 4C & D). When we did this, we found that for the AAs where  
363 MALEAA and FEMALEAA lay beyond the limits of the box plots, thus differing  
364 from the majority of permuted values, FLYAA tended to differ from the permuted  
365 values in the same way. Thus, the actual transcriptome weighted AA profiles that

366 we found for males and females used AA in a manner more similar to the non-  
367 weighted AA profile (FLYAA) than the majority of the permuted profiles. This  
368 could indicate a constraint on AA usage that limits the degree to which the  
369 transcriptome can modify the consumer's AA requirements.

370

371 For organisms to maximise efficiency when using the limited amounts of dietary  
372 protein that are available, we anticipate that any constraints on AA usage in an  
373 individual organism may also be conserved across species. In particular, when  
374 moving up trophic levels, we expect that AA heterotrophs, which are higher-level  
375 consumers and cannot synthesise all AAs *de novo*, may contain very similar AA  
376 profiles to the diet they consume because they are confined to using AAs in the  
377 proportions found in their food. By contrast, AA autotrophs, which can produce  
378 all 20 protein-coding AAs, might have more divergent profiles. To assess this, we  
379 compared the exome-matched AA proportions for a range of species at different  
380 trophic levels against the AA proportions found in the *Drosophila* exome-matched  
381 profile (Figure 5A). This included yeast (*Saccharomyces cerevisiae*), the fly's food  
382 source (Markow, 2015), plants on which yeast may grow (*Zea mays*, *Solanum*  
383 *tuberosum*) as well as an organism that eats *Drosophila* (the spider *Parasteatoda*  
384 *tepidariorum*), and two additional levels of higher consumers (chicken *Gallus*  
385 *gallus* and humans *Homo sapiens*). We found that the AA profiles of the higher  
386 eukaryotes were more similar to the FLYAA profile than that of the autotroph  
387 yeast, as anticipated (Figure 5A). However, high similarity to FLYAA was not  
388 simply limited to AA heterotrophs, since the plants, which are AA autotrophs,  
389 were more similar to FLYAA than the similarity found between yeast and FLYAA.  
390 In summary, the AA proportions encoded by the exomes of heterotrophs in a  
391 trophic chain do indeed appear to be highly similar to each other as we predicted,  
392 but the usage of AAs amongst autotrophs can vary more widely.

393

394 In an attempt to explain the pattern of AAs found for all species in our  
395 comparisons, we assessed the AA profiles as a function of their metabolic costs  
396 of biosynthesis, as described in (Krick *et al.*, 2014). We found that conservation  
397 of the energetic costs of biosynthesis for each AA provides a good explanation  
398 for the relative abundance of each AA in the predicted proteome of each of the  
399 seven organisms in our trophic chain (autotrophs and heterotrophs) and that the



400 slopes of this relationship between the organisms were indistinguishable ( $m = -$   
401  $416 \pm 18$ ,  $R^2 \geq 0.79$ ) (Figure 5B). Thus, although the AA profile of yeast appeared  
402 to be more distant from the fly than were the plants, this divergence involved  
403 changes in AA usage that caused no net change in the predicted metabolic cost  
404 of producing the proteome. Thus, the relative proportion of AAs encoded by an  
405 organism's exome can be explained by their metabolic costs of biosynthesis at  
406 the level of autotrophs, and this may constrain their pattern of usage in  
407 heterotrophs at higher trophic levels because they are limited by AA availability.  
408 This pattern of divergent AA profiles with preserved cost was also true when we  
409 extended the analysis to include another common unicellular AA autotroph,  
410 *Escherichia coli* (Figure 5B). However, when we also included several  
411 extremophiles in our analysis, two microbes that live in hydrothermal vents  
412 (*Deferribacter desulfuricans*, *Pyrococcus furiosus*) and two from salt lakes  
413 (*Natronolimnobius sulfurireducens*, *Thiohalospira halophila*), they continued to  
414 show a strong inverse relationship between the cost of biosynthesis and the  
415 relative abundance of each AA, but with a shallower slope ( $m = -270 \pm 1$ ,  
416  $R^2 \geq 0.67$ ) (Figure 5B). Thus, environmental conditions may constrain the  
417 proteome profiles of producers according to the metabolic costs of AA production,  
418 and this may shape the pattern of AA usage across trophic levels from unicellular  
419 autotrophs to higher-order predators.

420

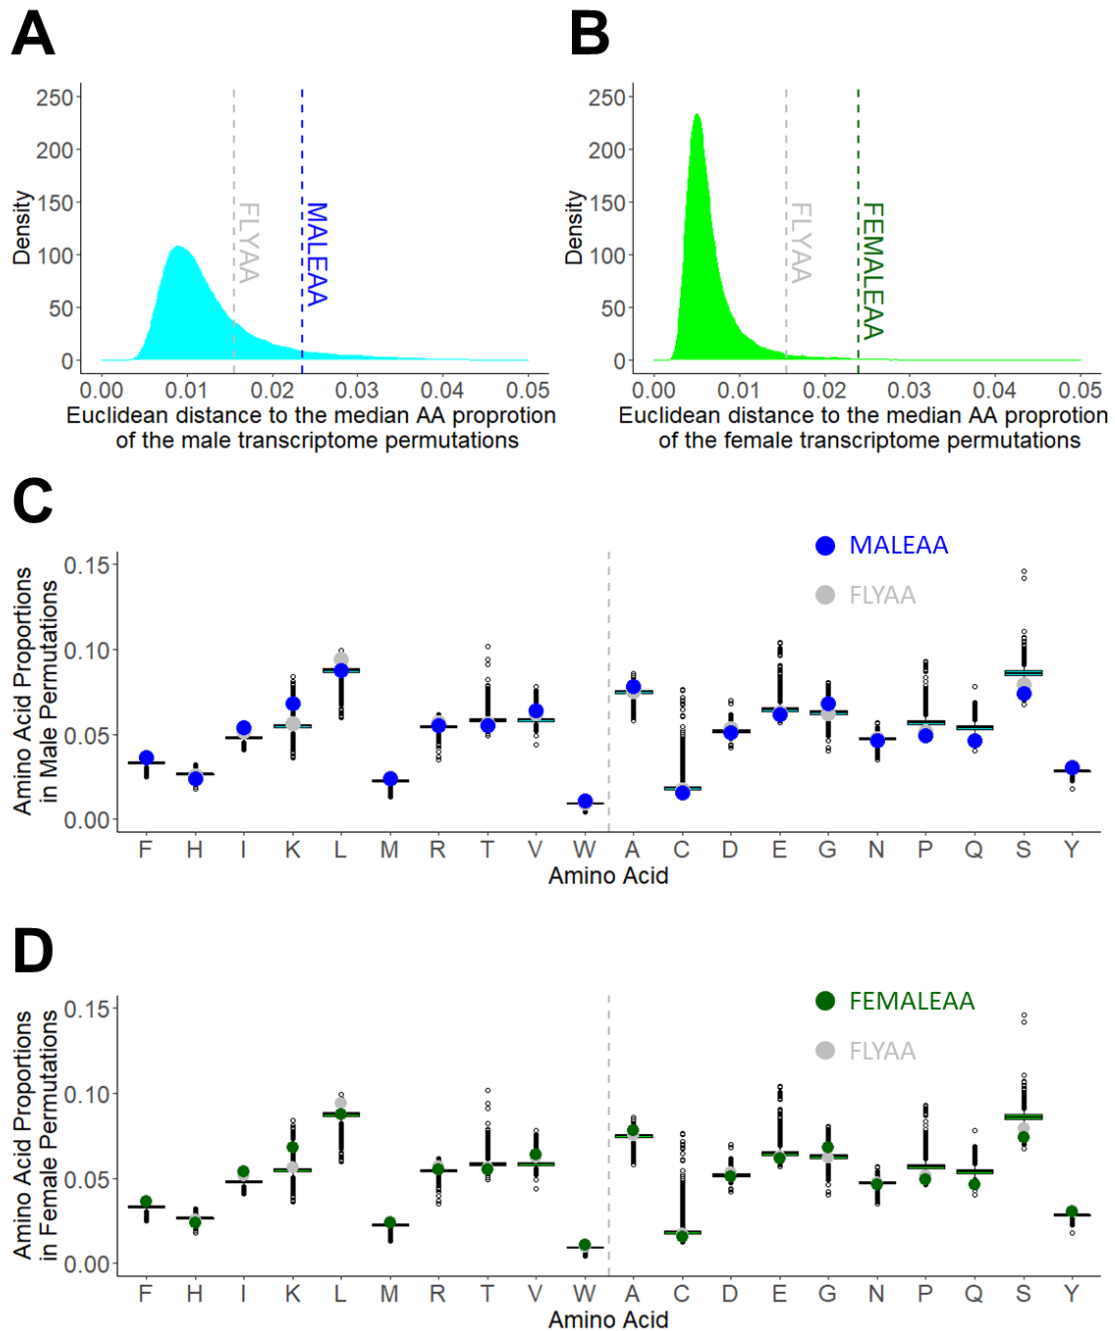

421

422 *FIGURE 4. USING PERMUTED TRANSCRIPTOME-WEIGHTED AA PROFILES TO COMPARE*  
423 *THE WAY IN WHICH THE SEX-SPECIFIC TRANSCRIPTOME WEIGHTED PROFILES DIFFER*  
424 *FROM EXOME MATCHING.*

425 (A, B) We permuted the gene labels in our male (A) and female (B) transcriptome data  
426 20,000 times and calculated a new transcriptome-weighted AA profile for each  
427 permutation. We then calculated the Euclidean distances from the median AA  
428 proportion of the permuted profiles to each permutation from the male (cyan) (A) and  
429 female (light green) (B) transcriptome data as well as the distance to MALEAA

430 (dashed blue line) (A), FEMALEAA (dashed green line) (B) and FLYAA (dashed grey  
431 line) (A,B).  
432 (C, D) The relative proportion of each AA for all permuted profiles as well as the proportions  
433 found for MALEAA (blue) (C), FEMALEAA (green) (D), and FLYAA (grey) (C, D). The  
434 vertical grey dashed line separates essential (left) from non-essential (right) AAs. The  
435 median AA values are represented by a horizontal line dividing the boxes. The boxes  
436 represent the interquartile range (50% of the permuted values).

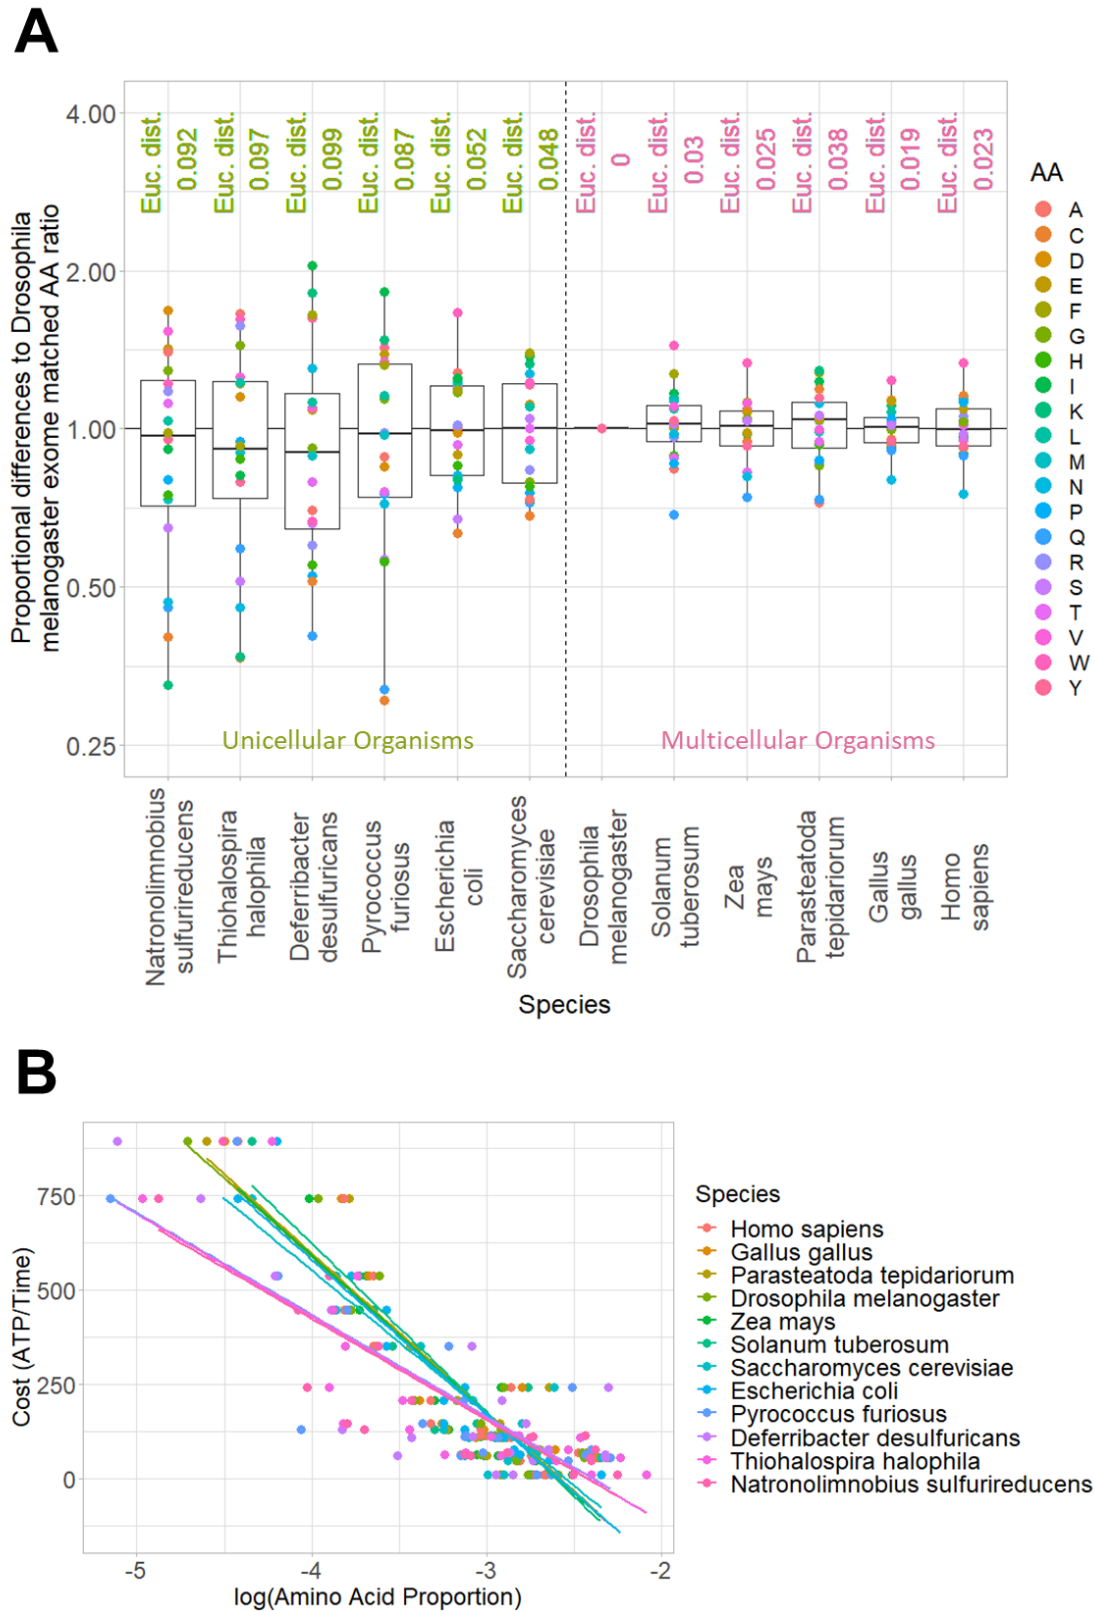

437

438 *FIGURE 5. CROSS-SPECIES COMPARISONS OF GENOME-WIDE AA PROPORTIONS*

439 *INDICATE CONSTRAINTS AT THE LEVEL OF THE ENERGETIC COSTS OF BIOSYNTHESIS.*

440

441 A) Proportional difference in AA concentrations between the exome matched AA ratio  
442 (FLYAA) and several multicellular (right) and unicellular (left) species. The Euclidean  
443 distance (indicated at the top of the plot) indicates the degree of divergence of each  
444 ratio from the exome of *Drosophila melanogaster*.

445

446 B) The log-transformed exome matched AA proportions of all tested species and diets  
447 inversely correlated in a linear fashion with the metabolic cost of AA generation  
448 ( $R^2 \geq 0.67$ , which increased to  $R^2 \geq 0.79$  in non-extremophiles). The equations derived  
449 from the linear models clustered in two groups based on their slope: extremophiles  
450 (*P. furiousus*, *D. desulfuricans*, *T. halophila*, *N. sulfurireducens*) ( $m = -270 \pm 1$ ) and all  
451 other organisms ( $m = -416 \pm 18$ ).

452

453

## 454 DISCUSSION

455

456 Dietary nitrogen availability limits reproductive fitness and population growth in  
457 multiple species, from algae to insects, birds, and mammals (Smith, 1968, 1991;  
458 Nixon, McClain and Donohoe, 1975; Bosman and Hockey, 1986; White, 1993;  
459 Ågren, 2004; Bi *et al.*, 2005; Webb *et al.*, 2005; Grandison, Piper and Partridge,  
460 2009). For higher organisms, this limitation has been shown to occur at the level  
461 of the single essential AA that is most undersupplied in the diet relative to  
462 physiological demands (Grandison, Piper and Partridge, 2009; Piper *et al.*, 2017;  
463 Solon-Biet *et al.*, 2019). To overcome this limitation, organisms have evolved  
464 numerous behavioural, symbiotic, biochemical, and physical adaptations that  
465 enable them to seek out, acquire, and metabolise dietary nitrogen and/or protein  
466 with high efficiency (White, 1993; Sørensen *et al.*, 2008; Gosby *et al.*, 2011;  
467 Simpson and Raubenheimer, 2012; Simpson, Le Couteur and Raubenheimer,  
468 2015; Almeida de Carvalho and Mirth, 2017; Leitão-Gonçalves *et al.*, 2017;  
469 Simpson *et al.*, 2017; Solon-Biet *et al.*, 2019). Our data here reveal that these  
470 systems achieve additional levels of efficiency because organisms require a  
471 relatively constant proportion of AAs across diverse conditions, and this  
472 proportion is closely matched to the diets they consume.

473

474 We observed that female and male flies show a marked difference in the absolute  
475 levels of dietary protein that is required to support maximal fecundity, with  
476 females requiring ~5-times more than males. This difference is in agreement with  
477 females having a higher anabolic demand for producing gametes and is reflected  
478 in the fact that females express a greater preference for protein-rich diets than  
479 males (Camus *et al.*, 2018). However, we were surprised to find that although  
480 males and females differ in expression of ~50% of their genome, they exhibit no  
481 observable difference in proportions of AAs (i.e. protein quality) that they require  
482 to maximise fecundity. What's more, the calculated transcriptome-weighted AA  
483 profiles of both males and females are similar to the AA profile calculated from  
484 the exome without including expression weightings. These data indicate that for  
485 other important physiological changes that require less substantial remodelling of  
486 the transcriptome, such as when launching an immune response, the flies'  
487 requirements for each AA will be met by the same, exome-matched protein

488 quality. For this reason, we predict that exome matching (without weighting for  
489 gene expression) is a generally good estimation of the flies' dietary AA  
490 requirements under a broad range of conditions.

491

492 Despite the general conservation that we found in the exome-matched AA profiles  
493 for consumers at higher trophic levels, we observed an increased variability  
494 amongst AA autotrophs. This observation highlights a new nutritional dimension  
495 (to the level of AAs) to the already recognised divergence in the flexibility of  
496 biomass composition in autotrophs when compared to heterotrophic consumers  
497 (Sperfeld *et al.*, 2017). It also means that animals consuming at the  
498 autotroph/heterotroph interface, such as flies feeding on their natural food source,  
499 yeast, are more likely to experience a mismatch between the profile of AAs they  
500 consume and what they require for fitness. As a consequence of this mismatch,  
501 we predict that organisms feeding at this interface are more likely to exhibit  
502 enhanced performance when their natural diets are supplemented with essential  
503 AAs than are heterotrophs that consume other heterotrophs (e.g. hyper  
504 carnivores). For several organisms, including flies, there is empirical evidence to  
505 support this prediction (Peoples *et al.*, 1994; Ramsay and Houston, 1998; Webb  
506 *et al.*, 2005; Grandison, Piper and Partridge, 2009; Piper *et al.*, 2014). Further, if  
507 this mismatch is an ongoing fitness constraint, consumers should evolve  
508 mechanisms to specifically buffer against shortfalls in the supply of the most  
509 limiting AA (Anderson, Boersma and Raubenheimer, 2004). In other work, we  
510 have found that flies feeding on their natural food source, yeast, are methionine  
511 limited for egg production (Grandison, Piper and Partridge, 2009; Piper *et al.*,  
512 2017) and when we omit any one of the flies' 10 essential AAs from the diet, egg-  
513 laying is arrested (Sang and King, 1961) (André Nogueira Alves, *personal*  
514 *communication*). Interestingly, the rate at which egg-laying declines varies  
515 depending on the identity of the missing AA: for the omission of any one of eight  
516 of the flies' ten essential AAs, there is a rapid arrest in egg production that takes  
517 ~3 days, whereas omitting either methionine or histidine results in a much slower  
518 decline, taking ~7 days and ~5 days respectively to cease egg production (André  
519 Nogueira Alves, *personal communication*). Thus, flies have evolved a mechanism  
520 that buffers egg production against fluctuations in the most limiting essential AA  
521 (methionine) as well as the AA that exome matching predicts to be the second

522 most limiting (histidine). Interestingly, in other work, we have found that egg-  
523 laying of flies feeding on yeast is not only limited by dietary AAs, but also by  
524 dietary sterols (Zanco *et al.*, 2021) - a nutritional co-limitation that has been  
525 recognised in other organisms (Martin-Creuzburg, Sperfeld and Wacker, 2009;  
526 Wacker and Martin-Creuzburg, 2012). Again, we find that flies can buffer against  
527 fluctuations in this limiting nutrient, since they continue to produce high-quality  
528 eggs even when the diet is completely depleted of sterols (Zanco *et al.*, 2021).  
529 By contrast, flies quickly arrest egg production in the absence of any other  
530 essential micronutrient (Wu *et al.*, 2020). The agreement between the identity of  
531 the nutrients against which the flies possess buffering capacity and those that we  
532 have found experimentally to be limiting in the diet makes a compelling case that  
533 these are specifically evolved adaptations.

534

535 Understanding the way organisms interact with their nutritional environments has  
536 been the topic of an enormous body of research. Historically, the models  
537 employed to study ecosystem dynamics have employed a single currency  
538 (energy), but work over the last 30 years has described and modelled the role of  
539 other nutritional components in ecological constraints and organismal fitness  
540 (Lindeman, 1991; Sterner and Elser, 2002; Simpson and Raubenheimer, 2012).  
541 Ecological Stoichiometry and Nutritional Geometry are two such models that  
542 provide complementary approaches to describing these systems (Sperfeld *et al.*,  
543 2017; Anderson *et al.*, 2020; Burian, Nielsen and Winder, 2020). Ecological  
544 Stoichiometry explains individual and ecosystem-level phenomena as shaped by  
545 the availability of energy and the chemical elements (e.g. carbon, nitrogen and  
546 phosphorous) that make up biomass (Sterner and Elser, 2002). By contrast,  
547 Nutritional Geometry models the same phenomena from the point of view of the  
548 biochemicals (e.g. carbohydrates and proteins) that modify feeding behaviour  
549 and evolutionary fitness (Simpson and Raubenheimer, 1993). Our data show an  
550 association between the energetic and elemental constraints on autotrophs in  
551 shaping the proportions of the biochemicals (AAs) whose limitation shapes the  
552 composition of heterotroph biomass. These data underscore the importance of  
553 considering the most relevant constraints of the trophic level under study and  
554 highlight the need for emerging models that seek to combine the two approaches



555 (Anderson, Boersma and Raubenheimer, 2004; Anderson *et al.*, 2020; Burian,  
556 Nielsen and Winder, 2020).

557

558 Part of the motivation of our study was to generate a new way of tailoring dietary  
559 AA profiles to meet the changing demands of organisms as they progress through  
560 development and experience altered health. Here we find no theoretical or  
561 experimental evidence to undertake such measures since the organism's AA  
562 requirements for its expressed genome tend to converge on that encoded by the  
563 exome. Thus, exome matching can serve as a simple guide to establish the  
564 dietary AA requirements of animals and so spare some of the expensive, time-  
565 consuming, and physically invasive efforts that are employed to determine the  
566 optimal dietary AA requirements of animals in agriculture (Levesque *et al.*, 2010;  
567 Boye, Wijesinha-Bettoni and Burlingame, 2012) and for humans for health  
568 (Institute of Medicine, 2005).

569

## 570 MATERIALS AND METHODS

### 571 DIETS

#### 572 SUGAR/YEAST (SY) FOOD

573 Our sugar-yeast (SY) food contained sugar (Bundaberg, M180919) (50 g/L),  
574 brewer's yeast (MP Biomedicals, 903312) (100 g/L), agar (Gelita, A-181017) (10  
575 g/L), propionic acid (Merck, 8.00605.0500) (3 mL/L) and nipagin (Sigma-Aldrich,  
576 W271004-5KG-K) (12 g/L), prepared as in (Bass et al., 2007). Refer to  
577 Supplementary Table 1 for more detailed product information.

#### 578 HOLIDIC DIETS

#### 579 EXOME-MATCHED AA RATIO DIET (FLYAA)

580 Chemically defined (holidic) diets used the recipe and were prepared as in (2). In  
581 all cases, the concentration of all nutrients, except AAs, were held constant at the  
582 levels published in (Piper *et al.*, 2017) (Supplementary Table 1 and 2). The AA  
583 ratio was either matched to the fly exome, FLYAA (Piper *et al.*, 2017), or the  
584 transcriptome-weighted dietary AA ratios (Table 1). Refer to Supplementary  
585 Table 1 for more detailed product information.

|                           |   | MOLAR RATIO |          |       |
|---------------------------|---|-------------|----------|-------|
|                           |   | MALEAA      | FEMALEAA | FLYAA |
| ESSENTIAL AMINO ACIDS     | F | 0.039       | 0.036    | 0.037 |
|                           | H | 0.023       | 0.024    | 0.026 |
|                           | I | 0.056       | 0.054    | 0.052 |
|                           | K | 0.062       | 0.068    | 0.057 |
|                           | L | 0.093       | 0.088    | 0.094 |
|                           | M | 0.026       | 0.024    | 0.025 |
|                           | R | 0.051       | 0.055    | 0.057 |
|                           | T | 0.054       | 0.055    | 0.056 |
|                           | V | 0.063       | 0.064    | 0.062 |
|                           | W | 0.011       | 0.011    | 0.010 |
| NON-ESSENTIAL AMINO ACIDS | A | 0.079       | 0.078    | 0.075 |
|                           | C | 0.019       | 0.016    | 0.017 |
|                           | D | 0.049       | 0.051    | 0.053 |
|                           | E | 0.059       | 0.062    | 0.063 |
|                           | G | 0.068       | 0.068    | 0.062 |
|                           | N | 0.047       | 0.047    | 0.047 |
|                           | P | 0.052       | 0.049    | 0.052 |
|                           | Q | 0.044       | 0.046    | 0.046 |
|                           | S | 0.075       | 0.074    | 0.079 |
|                           | Y | 0.030       | 0.030    | 0.031 |

586

587 *TABLE 1. MOLAR RATIO OF AAS.*

588 The table shows the molar ratio of AAs in the exome matching diet (FLYAA) and in the male  
589 (MALEAA) and female (FEMALEAA) transcriptome matching diets.

590

591 **FLY STRAIN AND CONDITIONS**

592 All experiments were carried out using our outbred wild-type strain of *Drosophila*  
593 *melanogaster* called Dahomey (Mair, Piper and Partridge, 2005). Stock and  
594 experimental flies were kept under controlled conditions of 25°C with at least 65%  
595 relative humidity for a 12:12 h photoperiod. Stocks were maintained on SY food.

596 **MALE FECUNDITY ASSAY**

597 All flies were reared under standard density conditions as detailed in Bass et al.,  
598 2007 (Bass *et al.*, 2007). Males and virgin female flies were collected from 0 to  
599 5 h after emerging and kept separately in fresh standard SY food vials. When flies  
600 were two days old, male flies were transferred to chemically defined diets with  
601 different AA ratios (FLYAA or MALEAA) and different total AA concentrations (0  
602 g/L, 1.1 g/L, 2.1 g/L or 10.7 g/L). Following a seven-day adaptation period,  
603 individually housed males were placed with ten new age-matched (+/- 1 day)  
604 virgin females. After being co-housed for 24h, the females were removed and  
605 replaced with another ten virgin females. This procedure was repeated every day  
606 for seven days. All females that were removed from the vial containing the male  
607 were singly housed in a new vial containing SY food. After ten days on SY food,  
608 the vials with singly housed females were checked for the presence of offspring.  
609 For each male, the number of females he fertilised during each of these seven  
610 days was recorded.

611 **FEMALE EGG-LAYING ASSAY**

612 Upon emerging as adults, male and female flies were transferred to fresh SY food  
613 and kept together for 48hours. Then female flies were then separated from males  
614 and kept on chemically defined diets with different AA ratios (FLYAA or  
615 FEMALEAA) and different total AA concentrations (0 g/L, 5.4 g/L or 10.7 g/L).  
616 Each vial contained five females, and flies were transferred to fresh food every  
617 24h for eight days. The numbers of eggs laid per vial per day for eight days were  
618 counted, using QuantiFly software (2.0), and recorded (Waithe *et al.*, 2015).

619 CALCULATING THE EXOME AND TRANSCRIPTOME MATCHED  
620 AA PROPORTIONS

621

622 The fly exome matched AA ratio (FLYAA) was calculated as in (Piper *et al.*, 2017).

623 Modifications to this procedure were performed as described below.

624

625 DEVELOPMENT OF DIETARY TRANSCRIPTOME MATCHED AA RATIOS.

626

627 To estimate the transcriptome matched AA ratio, we computed the relative  
628 proportion ( $P$ ) of each AA in the transcriptome,  $P(AA_i)$  (where  $i$  indicates one of  
629 the 20 protein-coding AAs). This calculation was performed in two steps.

630 First, we calculated the number of instances of each AA encoded by each protein  
631 isoform,  $AA_{ij}$  (where  $j$  indicates a protein isoform). This overcame the previous  
632 limitation in exome matching in which protein isoforms and length was not  
633 considered in the exome matched calculation.

634

$$635 \quad AA_{ij} = |AA_{ij}|$$

636

637 To generate the transcriptome-weighted values for each AA ( $AA_i$ ), we multiplied  
638 the number of each AA in each isoform,  $AA_{ij}$ , by the isoform's expression level,  
639  $E_j$  (measured in FPKM levels). We then summed the transcriptome-weighted AA  
640 abundance for each AA for all protein isoforms in the expressed genome.

641

$$642 \quad AA_i = \sum_j (AA_{ij} * E_j)$$

643

644 To obtain the final proportion of each AA encoded by the transcriptome weighted  
645 exome  $P(AA_i)$ , we divided the total number of each type of AA,  $AA_i$ , by the sum  
646 of all transcriptome-weighted AAs,  $\sum_i AA_i$ .

647

$$648 \quad P(AA_i) = \frac{AA_i}{\sum_i AA_i}$$

649

650 Thus, the sum of the proportions of all transcriptome-weighted AAs was equal to  
651 one.

652 The dietary transcriptome matched AA ratios for male and female flies were  
653 obtained as the average AA ratio of five male and five female fly transcriptomes,  
654 three belonging to FlyAtlas 2 and two to ModEncode database (Table 1).

655 For all bioinformatics processing, we used R (3.4.4) and the R packages “seqinr”  
656 (3.4-5) and “stringr” (1.3.1) (Charif and Lobry, 2007; Wickham, 2010).

657

#### 658 IDENTIFICATION OF LIMITING AAS

659

660 The identification of the limiting AA, and the degree to which it was predicted  
661 limiting, was performed as described in (Piper *et al.*, 2017).

662

#### 663 TISSUE-SPECIFIC DATA COMPARISON

664 The AA ratio Cleveland plots generated to compare dietary AA ratios with tissue-  
665 specific transcriptome matched AA ratios were produced using the R package  
666 “ggplot2” (3.1.1) (Valero-Mora, 2010). On these Cleveland plots, we identified the  
667 limiting AA in the exome (FLYAA) and the whole male (MALEAA) and female  
668 (FEMALEAA) transcriptome matched dietary AA ratios assuming that the tissue  
669 AA demand corresponded to the tissue-specific transcriptome matched AA ratios.  
670 The coverage value of each AA was calculated by dividing the molar proportion  
671 of the AA supplied in each diet (FEMALEAA, MALEAA, or FLYAA) by the molar  
672 proportion of each tissue-specific AA ratio. This ratio was expressed as a  
673 percentage value. For every tissue, the essential AA with the lowest percentage  
674 coverage was predicted to be limiting.

675

#### 676 AA BIOSYNTHETIC COSTS

677 AA generation costs were obtained from (Krick *et al.*, 2014). Linear regression  
678 analysis between AA generation costs and the exome matching AA proportions  
679 from multiple species was performed using the “lm” (3.4.4) function in R and  
680 plotted using “ggplot2” (3.1.1) (Valero-Mora, 2010).

681 The exome matched AA ratio from various species was calculated by taking the  
682 sum of each AA's usage when all genes in the exome are counted once (i.e. not  
683 transcriptome weighted).

684

#### 685 TRANSCRIPTOME DATA PERMUTATIONS

686 To calculate the transcriptome matched AA ratio, we sum the number of each AA  
687 in each gene multiplied by its expression calculated by FPKM. Then we divide  
688 the total count for each AA across all genes by the total number of all AAs across  
689 all genes. For each of the 20,000 permutations, we performed the same  
690 calculation after randomly assigning the expression weightings to genes in the  
691 genome.

692

## 693 TRANSCRIPTOMES

### 694 FILES AND DATABASES

695 Transcriptomic data for wild-type *Drosophila melanogaster* were obtained from  
696 Flyatlas 2, (European Nucleotide Archive, ENA, Study Accession: PRJEB22205)  
697 and ModEncode (ENA Study Accession: SRP006203) (Robinson *et al.*, 2013;  
698 Brown and Celniker, 2015). The transcriptomes downloaded corresponded to  
699 RNAseq files from whole male flies (Flyatlas 2, ModEncode), whole female flies  
700 (Flyatlas 2, ModEncode), and tissue-specific RNAseq data from male and female  
701 flies (Flyatlas 2). Reference genomes, gene annotations, and translated exomes  
702 were downloaded from the Ensembl database and Flybase (release: r6.21).

703

### 704 TRANSCRIPTOME PROCESSING

705 RNAseq raw reads were trimmed for low-quality bases by Trimmomatic (0.38)  
706 (Bolger, Lohse and Usadel, 2014) using default quality cutoff parameters  
707 (<http://www.usadellab.org/cms/?page=trimmomatic> ). Any remaining rRNA reads  
708 were removed using SortmeRNA (4.2.0) (Kopylova, Noé and Touzet, 2012).  
709 Quality controls of the raw, trimmed, and aligned reads were performed by  
710 FastQC (0.11.17) and multiQC (v1.6) (Andrews *et al.*, 2015; Ewels *et al.*, 2016).  
711 After trimming rRNA and low-quality reads, at least 4 million reads were obtained  
712 on each trimmed RNAseq sample with at least a 90% overall alignment rate and  
713 a 75% unique alignment rate with the reference genome. Quality control data is  
714 available on request. Then, we used Hisat 2 (2.1.0) and Samtools (1.9), to map,  
715 index and sort the trimmed reads to the reference genome (Flybase release:  
716 r6.21) (Kim, Langmead and Salzberg, 2015). Transcript quantification was  
717 performed as Fragments per kilobase per million mapped read (FPKM) using  
718 Cufflinks (2.2.1) (Trapnell *et al.*, 2010).

719

720

## 721 DATA AVAILABILITY

722 The gene expression file was generated from RNASeq samples downloaded  
723 from the FlyAtlas 2 and modENCODE databases (see Materials and Methods).

## 724 AUTHOR CONTRIBUTIONS

725 All authors contributed to the planning, performing, and/or analysis of research.  
726 All authors suggested experiments, reviewed, and edited the manuscript. J.G.O.  
727 and M.D.W.P drafted the manuscript.

## 728 ACKNOWLEDGEMENTS

729 We thank Amy Dedman for her aid in research and laboratory management. We  
730 acknowledge the funding of the ARC (FT150100237) and the NHMRC (1182330)  
731 to M.D.W.P., as well as the ARC (FT170100259) to C.K.M.



## 732 REFERENCES

- 733 Ågren, G. I. (2004) 'The C:N:P stoichiometry of autotrophs - Theory and  
734 observations', *Ecology Letters*, 7(3), pp. 185–191. doi: 10.1111/j.1461-  
735 0248.2004.00567.x.
- 736 Almeida de Carvalho, M. J. and Mirth, C. K. (2017) 'Food intake and food  
737 choice are altered by the developmental transition at critical weight in  
738 *Drosophila melanogaster*', *Animal Behaviour*. Academic Press, 126, pp. 195–  
739 208. doi: 10.1016/j.anbehav.2017.02.005.
- 740 Anderson, T. R. *et al.* (2020) 'Geometric Stoichiometry: Unifying Concepts of  
741 Animal Nutrition to Understand How Protein-Rich Diets Can Be "Too Much of a  
742 Good Thing"', *Frontiers in Ecology and Evolution*. Frontiers Media S.A., 8, p.  
743 196. doi: 10.3389/fevo.2020.00196.
- 744 Anderson, T. R., Boersma, M. and Raubenheimer, D. (2004) 'Stoichiometry:  
745 Linking elements to biochemicals', *Ecology*. Ecological Society of America,  
746 85(5), pp. 1193–1202. doi: 10.1890/02-0252.
- 747 Andrews, S. *et al.* (2015) 'FastQC. A quality control tool for high throughput  
748 sequence data. Babraham Bioinformatics', *Babraham Institute*, 1(1), p. 1.  
749 Available at: <http://www.bioinformatics.babraham.ac.uk/projects/fastqc/>.
- 750 Bass, T. M. *et al.* (2007) 'Optimization of Dietary Restriction Protocols in  
751 *Drosophila*', *The Journals of Gerontology: Series A*, 62(10), pp. 1071–1081. doi:  
752 10.1093/gerona/62.10.1071.
- 753 Bi, J. L. *et al.* (2005) 'Influence of seasonal nitrogen nutrition fluctuations in  
754 orange and lemon trees on population dynamics of the glassy-winged  
755 sharpshooter (*Homalodisca coagulata*)', *Journal of Chemical Ecology*. Springer,  
756 31(10), pp. 2289–2308. doi: 10.1007/s10886-005-7102-3.
- 757 Bolger, A. M., Lohse, M. and Usadel, B. (2014) 'Trimmomatic: A flexible trimmer  
758 for Illumina sequence data', *Bioinformatics*. Oxford University Press, 30(15), pp.  
759 2114–2120. doi: 10.1093/bioinformatics/btu170.
- 760 Bosman, A. and Hockey, P. (1986) 'Seabird guano as a determinant of rocky  
761 intertidal community structure', *Marine Ecology Progress Series*, 32, pp. 247–  
762 257. doi: 10.3354/meps032247.
- 763 Boye, J., Wijesinha-Bettoni, R. and Burlingame, B. (2012) 'Protein quality  
764 evaluation twenty years after the introduction of the protein digestibility  
765 corrected AA score method', *British Journal of Nutrition*. Br J Nutr, 108(SUPPL.

- 766 2). doi: 10.1017/S0007114512002309.
- 767 Brown, J. B. and Celniker, S. E. (2015) 'Lessons from modENCODE', *Annual*  
768 *Review of Genomics and Human Genetics*, 16(1), pp. 31–53. doi:  
769 10.1146/annurev-genom-090413-025448.
- 770 Burian, A., Nielsen, J. M. and Winder, M. (2020) 'Food quantity–quality  
771 interactions and their impact on consumer behavior and trophic transfer',  
772 *Ecological Monographs*. Ecological Society of America, 90(1), p. e01395. doi:  
773 10.1002/ecm.1395.
- 774 Camus, M. F. *et al.* (2018) 'Dietary choices are influenced by genotype, mating  
775 status, and sex in *Drosophila melanogaster*', *Ecology and Evolution*. John Wiley  
776 and Sons Ltd, 8(11), pp. 5385–5393. doi: 10.1002/ece3.4055.
- 777 Camus, M. F., Piper, M. D. W. and Reuter, M. (2019) 'Sex-specific  
778 transcriptomic responses to changes in the nutritional environment', *eLife*. eLife  
779 Sciences Publications Ltd, 8. doi: 10.7554/eLife.47262.
- 780 Charif, D. and Lobry, J. R. (2007) 'SeqinR 1.0-2: A Contributed Package to the  
781 R Project for Statistical Computing Devoted to Biological Sequences Retrieval  
782 and Analysis', in, pp. 207–232. doi: 10.1007/978-3-540-35306-5\_10.
- 783 Denno, R. F. and Fagan, W. F. (2003) 'Might nitrogen limitation promote  
784 omnivory among carnivorous arthropods?', *Ecology*. Ecological Society of  
785 America, pp. 2522–2531. doi: 10.1890/02-0370.
- 786 Ewels, P. *et al.* (2016) 'MultiQC: summarize analysis results for multiple tools  
787 and samples in a single report', *Bioinformatics*, 32(19), pp. 3047–3048. doi:  
788 10.1093/bioinformatics/btw354.
- 789 Glück, E. (1988) 'Why do parent birds swallow the feces of their nestlings?',  
790 *Experientia*. Birkhäuser-Verlag, 44(6), pp. 537–539. doi: 10.1007/BF01958943.
- 791 Gosby, A. K. *et al.* (2011) 'Testing protein leverage in lean humans: A  
792 randomised controlled experimental study', *PLoS ONE*. PLoS One, 6(10). doi:  
793 10.1371/journal.pone.0025929.
- 794 Grandison, R. C., Piper, M. D. W. and Partridge, L. (2009) 'Amino-acid  
795 imbalance explains extension of lifespan by dietary restriction in *Drosophila*',  
796 *Nature*. Nature Publishing Group, 462(7276), pp. 1061–1064. doi:  
797 10.1038/nature08619.
- 798 Hegedus, Z. *et al.* (2009) 'Deep sequencing of the zebrafish transcriptome  
799 response to mycobacterium infection', *Molecular Immunology*. Pergamon,

800 46(15), pp. 2918–2930. doi: 10.1016/j.molimm.2009.07.002.

801 Institute of Medicine (2005) ‘Dietary Reference Intakes for Energy,  
802 Carbohydrate, Fiber, Fat, Fatty Acids, Cholesterol, Protein, and AAs  
803 (Macronutrients)’, *National Academies Press*, pp. 1–1331. doi: 10.17226/10490.

804 Jang, T. and Lee, K. P. (2018) ‘Comparing the impacts of macronutrients on  
805 life-history traits in larval and adult *Drosophila melanogaster*: The use of  
806 nutritional geometry and chemically defined diets’, *Journal of Experimental*  
807 *Biology*. Company of Biologists Ltd, 221(21). doi: 10.1242/jeb.181115.

808 Keith, M. O. and Bell, J. M. (1989) ‘The Utilization of Nitrogen for Growth in  
809 Mice Fed Blends of Purified Proteins’, *Proceedings of the Society for*  
810 *Experimental Biology and Medicine*. Proc Soc Exp Biol Med, 190(3), pp. 246–  
811 253. doi: 10.3181/00379727-190-42856.

812 Kim, D., Langmead, B. and Salzberg, S. L. (2015) ‘HISAT: A fast spliced aligner  
813 with low memory requirements’, *Nature Methods*. Nature Publishing Group,  
814 12(4), pp. 357–360. doi: 10.1038/nmeth.3317.

815 Kopylova, E., Noé, L. and Touzet, H. (2012) ‘SortMeRNA: Fast and accurate  
816 filtering of ribosomal RNAs in metatranscriptomic data’, *Bioinformatics*, 28(24),  
817 pp. 3211–3217. doi: 10.1093/bioinformatics/bts611.

818 Krick, T. *et al.* (2014) ‘AA metabolism conflicts with protein diversity’, *Molecular*  
819 *Biology and Evolution*. Oxford University Press, 31(11), pp. 2905–2912. doi:  
820 10.1093/molbev/msu228.

821 Leitão-Gonçalves, R. *et al.* (2017) ‘Commensal bacteria and essential AAs  
822 control food choice behavior and reproduction’, *PLoS Biology*. Public Library of  
823 Science, 15(4), p. e2000862. doi: 10.1371/journal.pbio.2000862.

824 Levesque, C. L. *et al.* (2010) ‘Review of advances in metabolic bioavailability of  
825 AAs’, *Livestock Science*, pp. 4–9. doi: 10.1016/j.livsci.2010.06.013.

826 Li, S. T. *et al.* (2019) ‘DAF-16 stabilizes the aging transcriptome and is activated  
827 in mid-aged *Caenorhabditis elegans* to cope with internal stress’, *Aging Cell*.  
828 Blackwell Publishing Ltd, 18(3), p. e12896. doi: 10.1111/accel.12896.

829 Lindeman, R. L. (1991) ‘The trophic-dynamic aspect of ecology’, *Bulletin of*  
830 *Mathematical Biology*. Kluwer Academic Publishers, 53(1–2), pp. 167–191. doi:  
831 10.1007/BF02464428.

832 Lochmiller, R. L. *et al.* (1995) ‘Habitat-induced changes in essential amino-acid  
833 nutrition in populations of eastern cottontails’, *Journal of Mammalogy*. Allen

- 834 Press Inc., 76(4), pp. 1164–1177. doi: 10.2307/1382608.
- 835 Mair, W., Piper, M. D. W. and Partridge, L. (2005) ‘Calories do not explain  
836 extension of life span by dietary restriction in *Drosophila*’, *PLoS Biology*. Public  
837 Library of Science, 3(7), pp. 1305–1311. doi: 10.1371/journal.pbio.0030223.
- 838 Manzoni, C. *et al.* (2018) ‘Genome, transcriptome and proteome: The rise of  
839 omics data and their integration in biomedical sciences’, *Briefings in*  
840 *Bioinformatics*, 19(2). doi: 10.1093/BIB/BBW114.
- 841 Markow, T. A. (2015) ‘The secret lives of *Drosophila* flies’, *eLife*. eLife Sciences  
842 Publications Ltd, 4(June). doi: 10.7554/eLife.06793.
- 843 Martin-Creuzburg, D., Sperfeld, E. and Wacker, A. (2009) ‘Colimitation of a  
844 freshwater herbivore by sterols and polyunsaturated fatty acids’, *Proceedings of*  
845 *the Royal Society B: Biological Sciences*. Royal Society, 276(1663), pp. 1805–  
846 1814. doi: 10.1098/rspb.2008.1540.
- 847 May, C. M. and Zwaan, B. J. (2017) ‘Relating past and present diet to  
848 phenotypic and transcriptomic variation in the fruit fly.’, *BMC genomics*. BioMed  
849 Central, 18(1), p. 640. doi: 10.1186/s12864-017-3968-z.
- 850 Moskalev, A. A. *et al.* (2019) ‘Transcriptome Analysis of Long-lived *Drosophila*  
851 *melanogaster* E(z) Mutants Sheds Light on the Molecular Mechanisms of  
852 Longevity’, *Scientific Reports*. Nature Publishing Group, 9(1). doi:  
853 10.1038/s41598-019-45714-x.
- 854 Nixon, C. M. (1970) ‘Insects as Food for Juvenile Gray Squirrels’, *American*  
855 *Midland Naturalist*. JSTOR, 84(1), p. 283. doi: 10.2307/2423756.
- 856 Nixon, C. M., McClain, M. W. and Donohoe, R. W. (1975) ‘Effects of Hunting  
857 and Mast Crops on a Squirrel Population’, *The Journal of Wildlife Management*.  
858 JSTOR, 39(1), p. 1. doi: 10.2307/3800460.
- 859 Oshlack, A. and Wakefield, M. J. (2009) ‘Transcript length bias in RNA-seq data  
860 confounds systems biology’, *Biology Direct* 2009 4:1. BioMed Central, 4(1), pp.  
861 1–10. doi: 10.1186/1745-6150-4-14.
- 862 Peoples, A. D. *et al.* (1994) ‘Limitations of AAs in diets of northern bobwhites  
863 (*Colinus virginianus*)’, *American Midland Naturalist*. University of Notre Dame,  
864 132(1), pp. 104–116. doi: 10.2307/2426205.
- 865 Pible, O. and Armengaud, J. (2015) ‘Improving the quality of genome, protein  
866 sequence, and taxonomy databases: A prerequisite for microbiome meta-omics  
867 2.0’, *Proteomics*, 15(20). doi: 10.1002/pmic.201500104.

- 868 Piper, M. D. W. *et al.* (2014) 'A holidic medium for *Drosophila melanogaster*',  
869 *Nature Methods*. Europe PMC Funders, 11(1), pp. 100–105. doi:  
870 10.1038/nmeth.2731.
- 871 Piper, M. D. W. *et al.* (2017) 'Matching Dietary AA Balance to the In Silico-  
872 Translated Exome Optimizes Growth and Reproduction without Cost to  
873 Lifespan', *Cell Metabolism*. Elsevier, 25(3), pp. 610–621. doi:  
874 10.1016/j.cmet.2017.02.005.
- 875 Ramsay, S. L. and Houston, D. C. (1998) 'The effect of dietary AA composition  
876 on egg production in blue tits', *Proceedings of the Royal Society B: Biological  
877 Sciences*, 265(1404), pp. 1401–1405. doi: 10.1098/rspb.1998.0448.
- 878 Robinson, S. W. *et al.* (2013) 'FlyAtlas: database of gene expression in the  
879 tissues of *Drosophila melanogaster*.' , *Nucleic acids research*. Oxford University  
880 Press, 41(Database issue), pp. D744-50. doi: 10.1093/nar/gks1141.
- 881 Sang, J. H. and King, R. C. (1961) 'Nutritional Requirements of Axenically  
882 Cultured *Drosophila Melanogaster* Adults', *Journal of Experimental Biology*,  
883 38(4), pp. 793–809. doi: 10.1242/jeb.38.4.793.
- 884 Simpson, S. J. *et al.* (2017) 'Dietary protein, aging and nutritional geometry',  
885 *Ageing Research Reviews*. Elsevier Ireland Ltd, pp. 78–86. doi:  
886 10.1016/j.arr.2017.03.001.
- 887 Simpson, S. J., Le Couteur, D. G. and Raubenheimer, D. (2015) 'Putting the  
888 balance back in diet', *Cell*. Cell Press, pp. 18–23. doi:  
889 10.1016/j.cell.2015.02.033.
- 890 Simpson, S. J. and Raubenheimer, D. (1993) 'A multi-level analysis of feeding  
891 behaviour: The geometry of nutritional decisions', *Philosophical Transactions of  
892 the Royal Society B: Biological Sciences*. Royal Society, 342(1302), pp. 381–  
893 402. doi: 10.1098/rstb.1993.0166.
- 894 Simpson, S. J. and Raubenheimer, D. (2012) 'The nature of nutrition: A unifying  
895 framework from animal adaptation to human obesity', *Princeton University  
896 Press*, pp. 1–239. doi: 10.5860/choice.50-2662.
- 897 Sjøberg, K. A. *et al.* (2020) 'Effects of Short-Term Dietary Protein Restriction on  
898 Blood AA Levels in Young Men', *Nutrients*. MDPI AG, 12(8), p. 2195. doi:  
899 10.3390/nu12082195.
- 900 Smith, C. C. (1968) 'The Adaptive Nature of Social Organization in the Genus of  
901 Three Squirrels *Tamiasciurus*', *Ecological Monographs*. Wiley, 38(1), pp. 31–64.

902 doi: 10.2307/1948536.

903 Smith, T. B. (1991) 'Behavioural Ecology of the Galah *Ecolophus Roseicapillus*

904 in the Wheatbelt of Western Australia . Ian Rowley', *The Quarterly Review of*

905 *Biology*, 66(4), pp. 504–504. doi: 10.1086/417390.

906 Solon-Biet, S. M. *et al.* (2015) 'Macronutrient balance, reproductive function,

907 and lifespan in aging mice', *Proceedings of the National Academy of Sciences*

908 *of the United States of America*. National Academy of Sciences, 112(11), pp.

909 3481–3486. doi: 10.1073/pnas.1422041112.

910 Solon-Biet, S. M. *et al.* (2019) 'Branched-chain AAs impact health and lifespan

911 indirectly via AA balance and appetite control', *Nature Metabolism*. Nature

912 Research, 1(5), pp. 532–545. doi: 10.1038/s42255-019-0059-2.

913 Sørensen, A. *et al.* (2008) 'Protein-leverage in mice: The Geometry of

914 macronutrient balancing and consequences for fat deposition', *Obesity*. Obesity

915 (Silver Spring), 16(3), pp. 566–571. doi: 10.1038/oby.2007.58.

916 Sperfeld, E. *et al.* (2017) 'Bridging Ecological Stoichiometry and Nutritional

917 Geometry with homeostasis concepts and integrative models of organism

918 nutrition', *Functional Ecology*. Edited by J. Harwood. Blackwell Publishing Ltd,

919 31(2), pp. 286–296. doi: 10.1111/1365-2435.12707.

920 Sterner, R. W. and Elser, J. J. (2002) 'Ecological Stoichiometry: The Biology of

921 Elements from Molecules to the Biosphere', *Princeton University Press*,

922 *Princeton, New Jersey, USA*. Princeton University Press, p. 439.

923 Trapnell, C. *et al.* (2010) 'Transcript assembly and quantification by RNA-Seq

924 reveals unannotated transcripts and isoform switching during cell

925 differentiation', *Nature Biotechnology*. Nature Publishing Group, 28(5), pp. 511–

926 515. doi: 10.1038/nbt.1621.

927 Valero-Mora, P. M. (2010) 'ggplot2: Elegant Graphics for Data Analysis',

928 *Journal of Statistical Software*. Springer International Publishing (Use R!),

929 35(Book Review 1), pp. 245–246. doi: 10.18637/jss.v035.b01.

930 Wacker, A. and Martin-Creuzburg, D. (2012) 'Biochemical nutrient requirements

931 of the rotifer *Brachionus calyciflorus*: Co-limitation by sterols and AAs',

932 *Functional Ecology*. John Wiley & Sons, Ltd, 26(5), pp. 1135–1143. doi:

933 10.1111/j.1365-2435.2012.02047.x.

934 Waithe, D. *et al.* (2015) 'QuantiFly: Robust trainable software for automated

935 *Drosophila* egg counting', *PLoS ONE*. Public Library of Science, 10(5). doi:

936 10.1371/journal.pone.0127659.  
937 Webb, R. E. *et al.* (2005) 'Impact of food supplementation and methionine on  
938 high densities of cotton rats: Support of the amino-acid-quality hypothesis?',  
939 *Journal of Mammalogy*. Oxford Academic, 86(1), pp. 46–55. doi: 10.1644/1545-  
940 1542(2005)086<0046:IOFSAM>2.0.CO;2.  
941 White, T. C. R. (1993) 'The Inadequate Environment', *Springer Berlin*  
942 *Heidelberg*. Berlin, Heidelberg: Springer Berlin Heidelberg. doi: 10.1007/978-3-  
943 642-78299-2.  
944 Wickham, H. (2010) 'Stringr: Modern, consistent string processing', *R Journal*,  
945 2(2), pp. 38–40. doi: 10.32614/rj-2010-012.  
946 Wilder, S. M. *et al.* (2013) 'Arthropod food webs become increasingly lipid-  
947 limited at higher trophic levels', *Ecology Letters*. Edited by F. Jordan. Blackwell  
948 Publishing Ltd, 16(7), pp. 895–902. doi: 10.1111/ele.12116.  
949 Wu, Q. *et al.* (2020) 'Sexual dimorphism in the nutritional requirement for adult  
950 lifespan in *Drosophila melanogaster*', *Aging Cell*. Blackwell Publishing Ltd,  
951 19(3), p. e13120. doi: 10.1111/accel.13120.  
952 Zanco, B. *et al.* (2021) 'A dietary sterol trade-off determines lifespan responses  
953 to dietary restriction in *drosophila melanogaster* females', *eLife*. eLife Sciences  
954 Publications Ltd, 10, pp. 1–20. doi: 10.7554/eLife.62335.  
955  
956

957 **SUPPLEMENTARY MATERIAL**

958

959 Supplementary Table 1. Detailed information of dietary components.

960 Supplementary Table 2. Composition of chemically defined diets.

961

962

963

964

965
